# Supplementary material
Source: HighWire-hosted journal article supplement (https://erj.ersjournals.com/content/58/4/2003823)
Supplement: inline-supplementary-material-3 [file inline-supplementary-material-3.pdf]

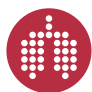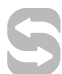

SHAREABLE PDF

# Blood eosinophil counts and the development of obstructive lung disease: the Kangbuk Samsung Health Study

Hye Yun Park<sup>1,8</sup>, Yoosoo Chang<sup>2,3,4,8</sup>, Danbee Kang<sup>5</sup>, Yun Soo Hong<sup>6</sup>, Di Zhao<sup>6</sup>, Jiin Ahn<sup>2</sup>, Sun Hye Shin <sup>1</sup>, Dave Singh<sup>7</sup>, Eliseo Guallar<sup>4,6</sup>, Juhee Cho <sup>2,4,5,9</sup> and Seungho Ryu<sup>2,3,4,9</sup>

<sup>1</sup>Division of Pulmonary and Critical Care Medicine, Dept of Medicine, Samsung Medical Center, Sungkyunkwan University School of Medicine, Seoul, Republic of Korea. <sup>2</sup>Center for Cohort Studies, Total Healthcare Center, Kangbuk Samsung Hospital, Sungkyunkwan University School of Medicine, Seoul, Republic of Korea. <sup>3</sup>Dept of Occupational and Environmental Medicine, Kangbuk Samsung Hospital, Sungkyunkwan University School of Medicine, Seoul, Republic of Korea. <sup>4</sup>Dept of Clinical Research Design and Evaluation, SAIHST, Sungkyunkwan University, Seoul, South Korea. <sup>5</sup>Center for Clinical Epidemiology, Samsung Medical Center, Seoul, South Korea. <sup>6</sup>Dept of Epidemiology and Welch Center for Prevention, Epidemiology and Clinical Research, Johns Hopkins University Bloomberg School of Public Health, Baltimore, MD, USA. <sup>7</sup>Medicines Evaluation Unit, University of Manchester, Manchester University NHS Foundation Trust, Manchester, UK. <sup>8</sup>Hye Yun Park and Yoosoo Chang contributed equally as first authors. <sup>9</sup>Seungho Ryu and Juhee Cho contributed equally as lead authors and supervised the work.

Corresponding author: Seungho Ryu ([sh703.yoo@gmail.com](mailto:sh703.yoo@gmail.com))

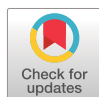

Shareable abstract (@ERSpublications)

**Blood eosinophil counts were positively associated with the risk of developing obstructive lung disease in a large longitudinal cohort of young and middle-aged men and women** <https://bit.ly/37QeCeW>

**Cite this article as:** Park HY, Chang Y, Kang D, *et al.* Blood eosinophil counts and the development of obstructive lung disease: the Kangbuk Samsung Health Study. *Eur Respir J* 2021; 58: 2003823 [DOI: 10.1183/13993003.03823-2020].

This single-page version can be shared freely online.

Copyright ©The authors 2021. For reproduction rights and permissions contact [permissions@ersnet.org](mailto:permissions@ersnet.org)

This article has supplementary material available from [erj.ersjournals.com](http://erj.ersjournals.com)

This article has an editorial commentary: <https://doi.org/10.1183/13993003.01105-2021>

Received: 13 Oct 2020  
Accepted: 22 Feb 2021

## Abstract

**Aim** The impact of blood eosinophil counts on the development of chronic obstructive lung disease (COPD) is unknown. We investigated whether a higher blood eosinophil count was associated with the risk of developing obstructive lung disease (OLD) in a large cohort of men and women free from lung disease at baseline.

**Methods** This was a cohort study of 359 456 Korean adults without a history of asthma and without OLD at baseline who participated in health screening examinations including spirometry. OLD was defined as pre-bronchodilator forced expiratory volume in 1 s (FEV<sub>1</sub>)/forced vital capacity (FVC) <0.7 and FEV<sub>1</sub> <80% predicted.

**Results** After a median (interquartile range) follow-up of 5.6 (2.9–9.2) years, 5008 participants developed incident OLD (incidence rate 2.1 (95% CI 2.1–2.2) per 1000 person-years). In the fully adjusted model, the hazard ratios for incident OLD comparing eosinophil counts of 100–<200, 200–<300, 300–<500 and ≥500 versus <100 cells·μL<sup>-1</sup> were 1.07 (95% CI 1.00–1.15), 1.30 (95% CI 1.20–1.42), 1.46 (95% CI 1.33–1.60) and 1.72 (95% CI 1.51–1.95), respectively (*p*<sub>trend</sub><0.001). These associations were consistent in clinically relevant subgroups, including never-, ex- and current smokers.

**Conclusion** In this large longitudinal cohort study, blood eosinophil counts were positively associated with the risk of developing of OLD. Our findings indicate a potential role of the eosinophil count as an independent risk factor for developing COPD.
